# Supplementary material for: An azobenzene-based photoswitchable crystal growth modifier
Source: Royal Society of Chemistry journal article supplement (doi:10.1039/c6ce02514e), 2017-01-01
Supplement: c6ce02514e1.pdf [file c6ce02514e1.pdf]

## **An azobenzene-based photoswitchable crystal growth modifier**

Gareth L. Nealon, David H. Brown, Franca Jones, Gordon Parkinson, and Mark I. Ogden

### **Supplementary Information**

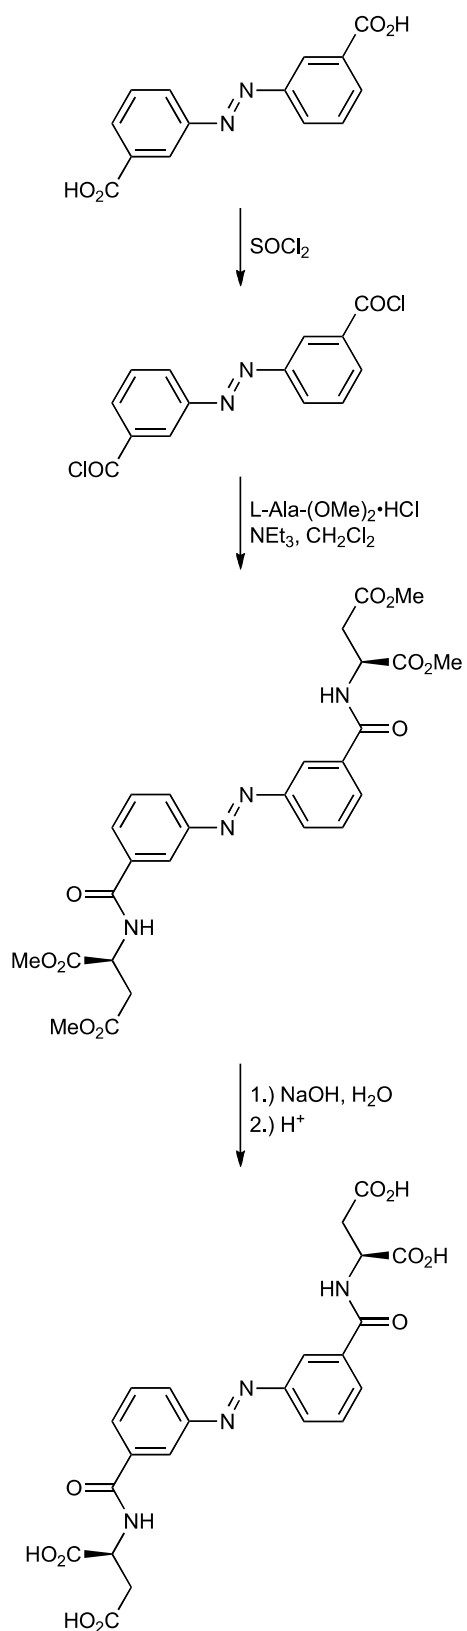

**Scheme S1.** Synthesis of the target substituted azobenzenes, as outlined for aspartic acid derivative **1**.

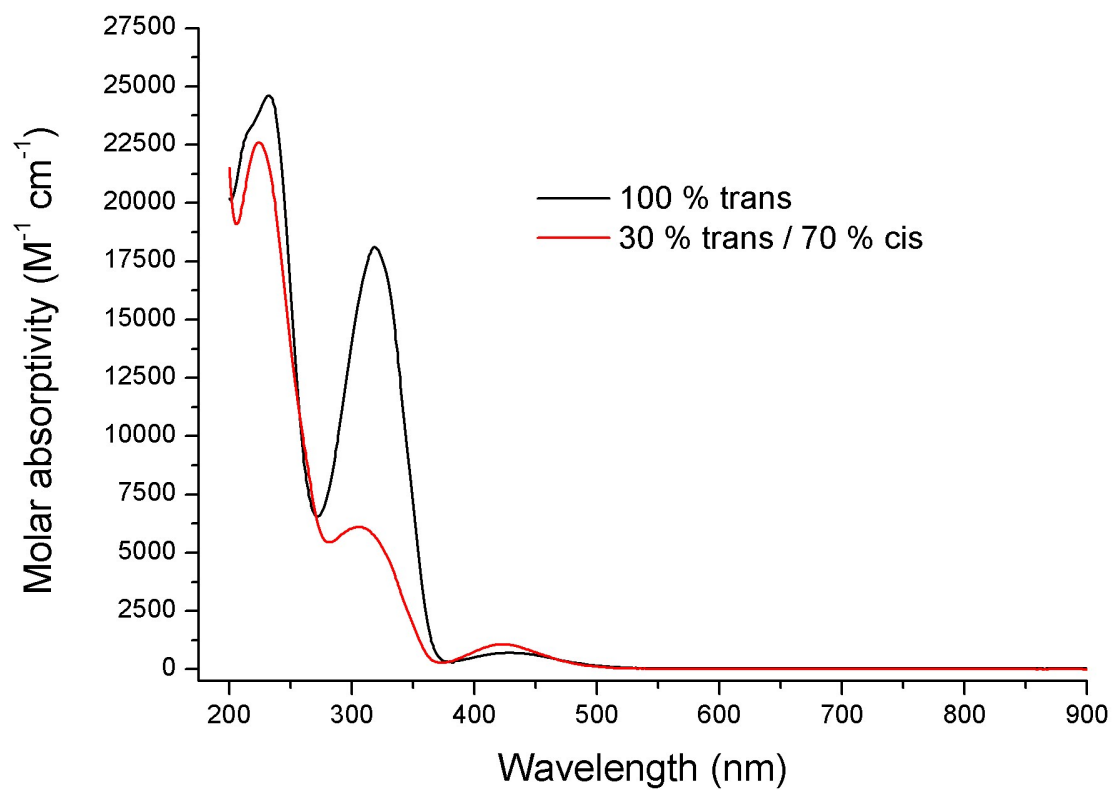

**Figure S1.** UV-Vis spectra of (1-4H)<sup>4+</sup> in aqueous solution. The black curve corresponds to the trans isomer, the red to a 70% cis/30% trans mixture.

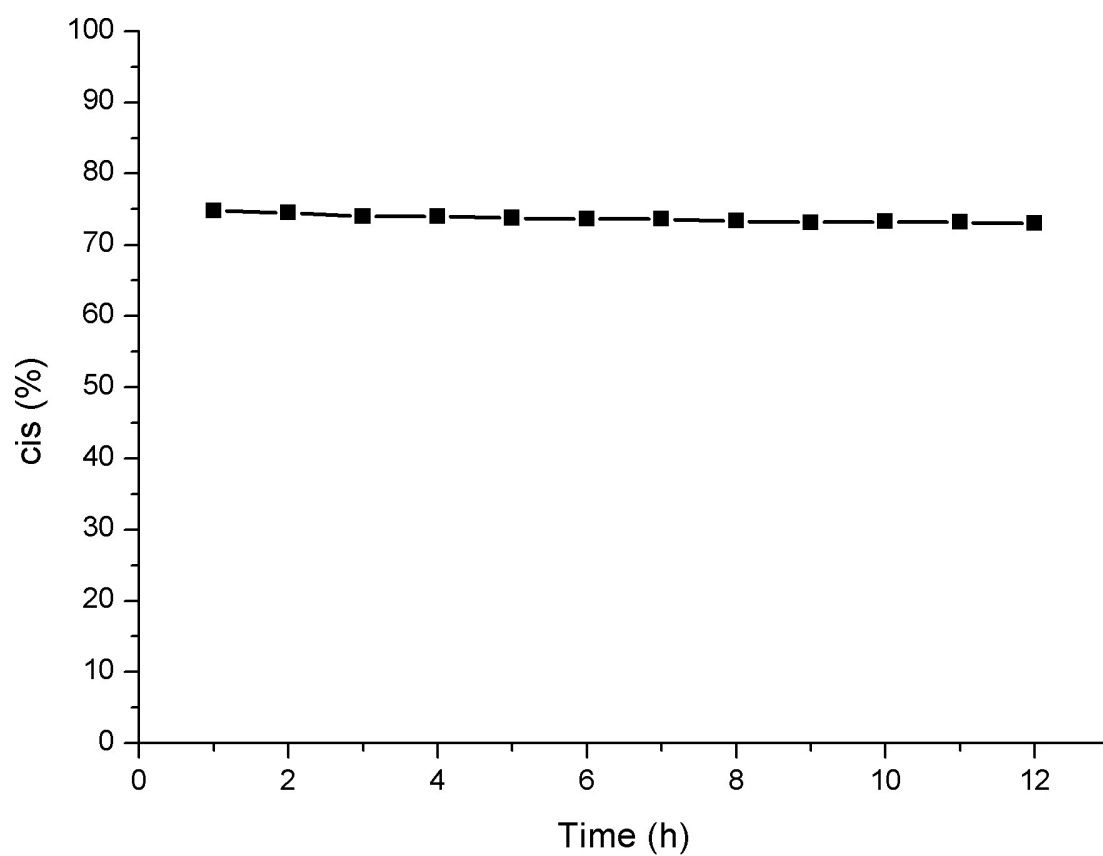

**Figure S2.** Rate of relaxation of *cis*-1 at 25 °C in the dark (from RP-HPLC analysis, 0.20 mM).

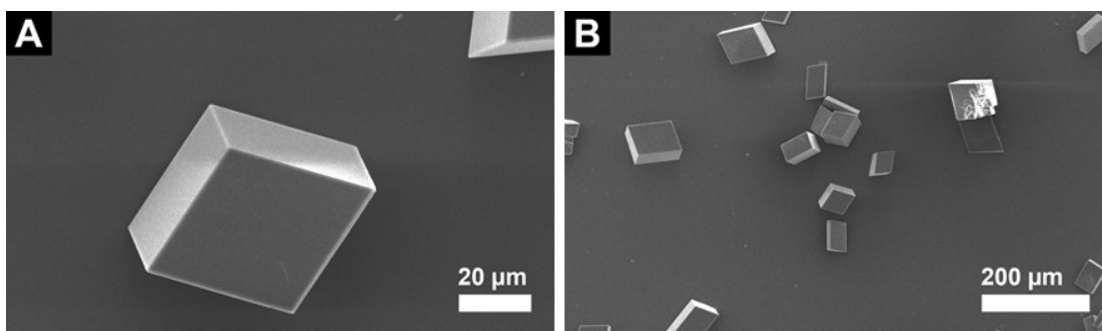

**Figure S3.** Calcite morphology observed in the presence of 500 ppm glycine functionalised additive **2**, at two different magnifications.

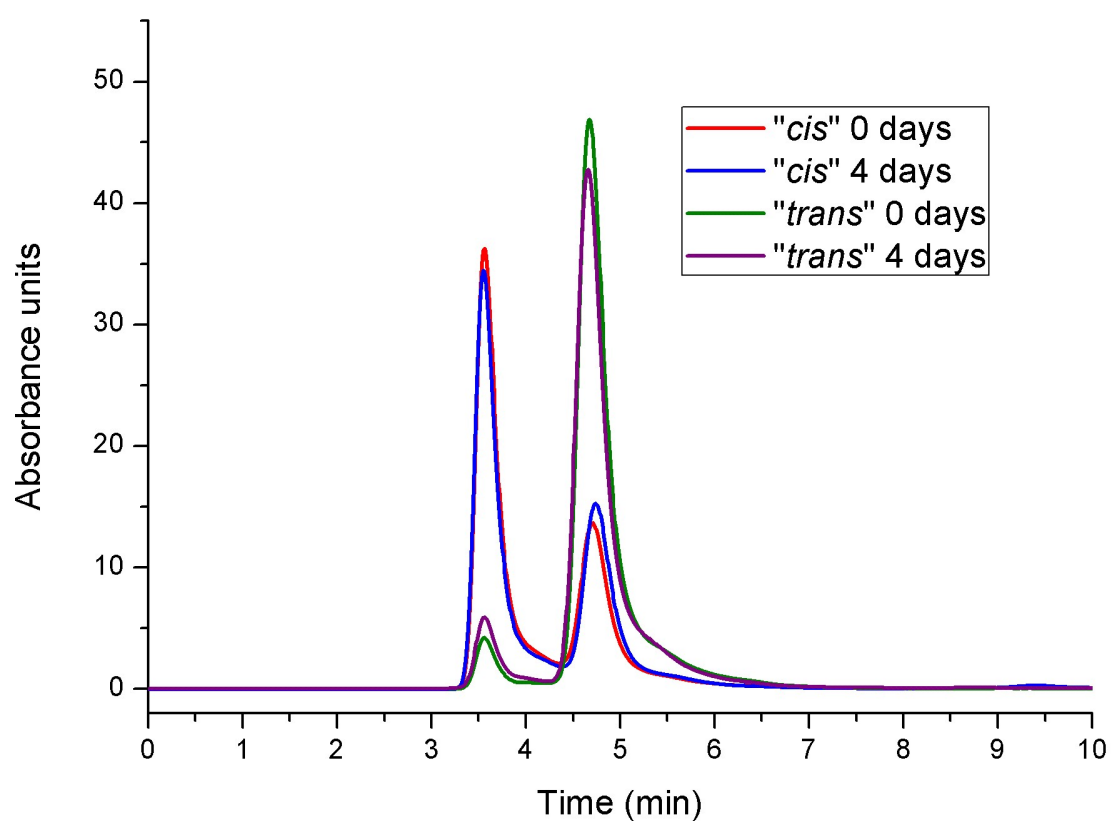

**Figure S4.** Representative RP-HPLC chromatograms before and after calcite crystallisation experiments in the presence of *cis*- and *trans*-**1** (shown for 0.2 mM additive). The first peak at 3.6 min corresponds to *cis*-**1**, and the second peak at 4.7 min corresponds to *trans*-**1**.

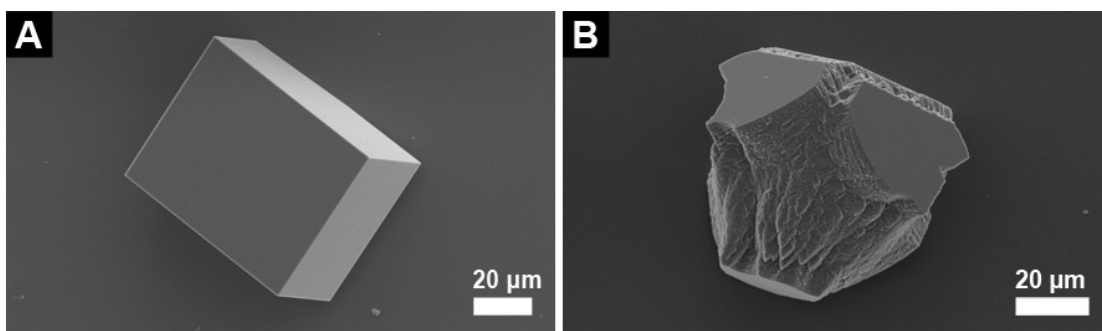

**Figure S5.** Calcite grown in the presence of compound **1**. (A) Under constant UV irradiation and (B) maintained in the dark.

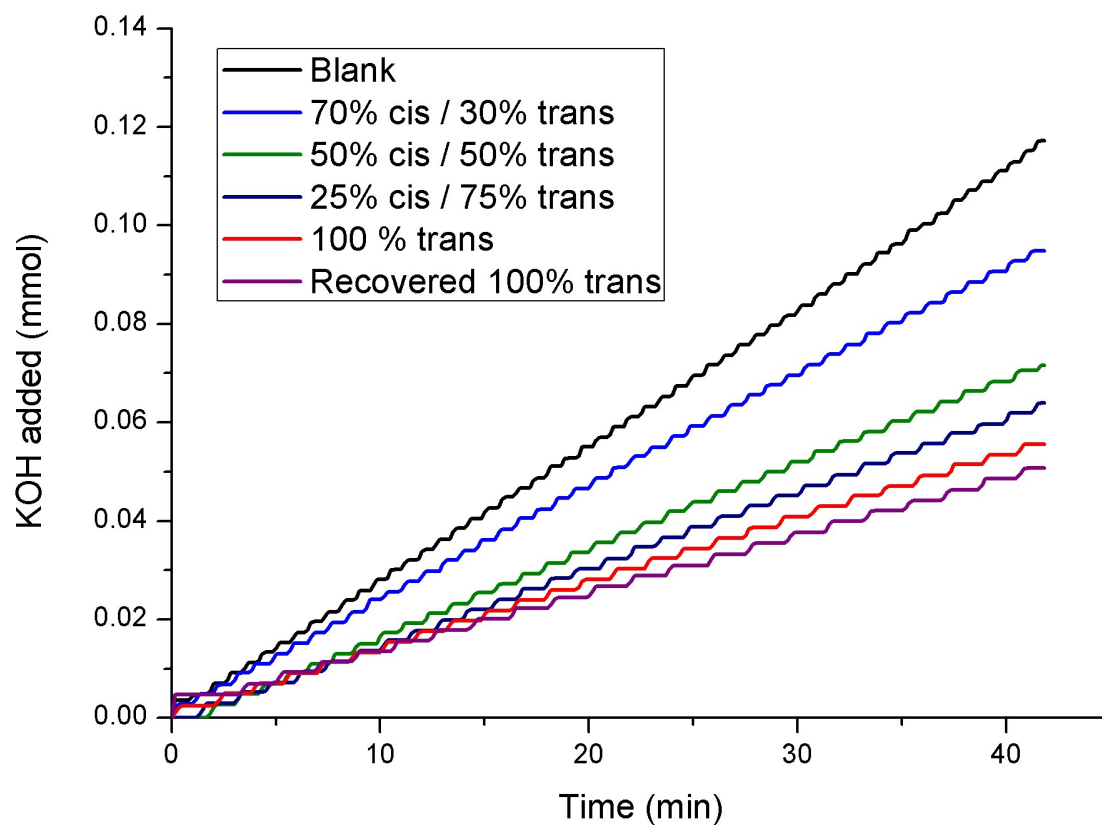

**Figure S6.** Raw data for the graph depicted in Figure 6 in the article.

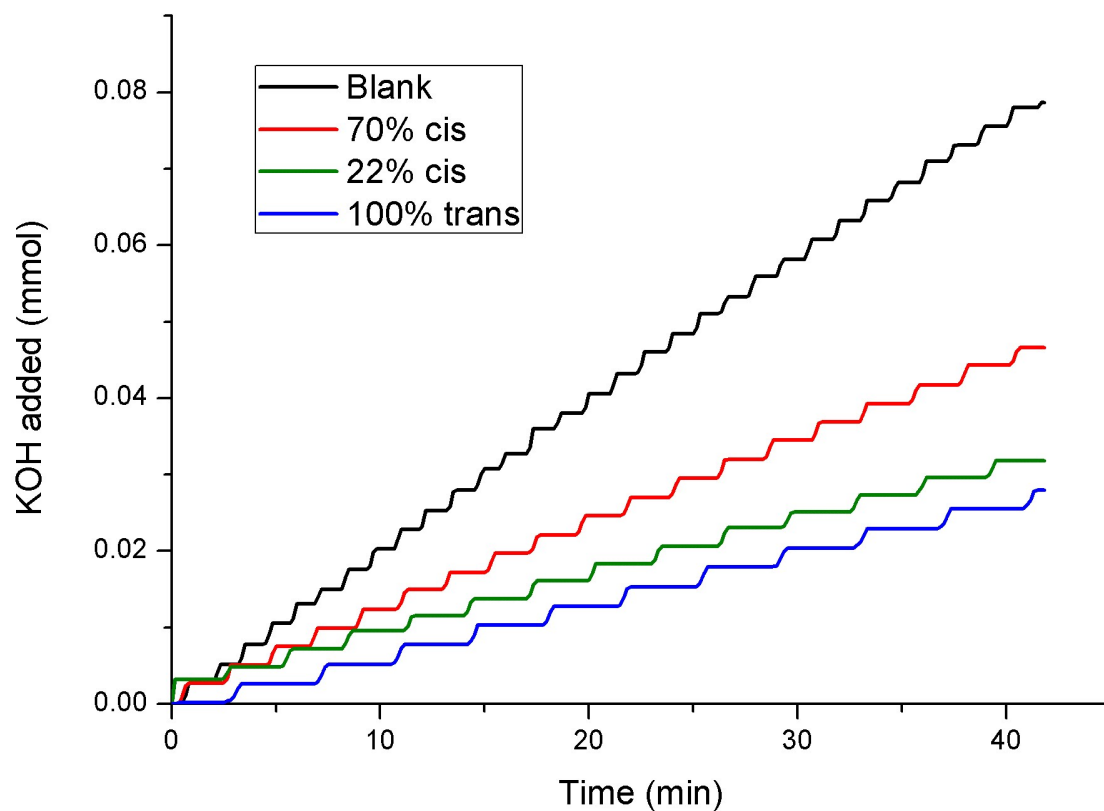

**Figure S7.** Raw data for the graph depicted in Figure 7 in the article.

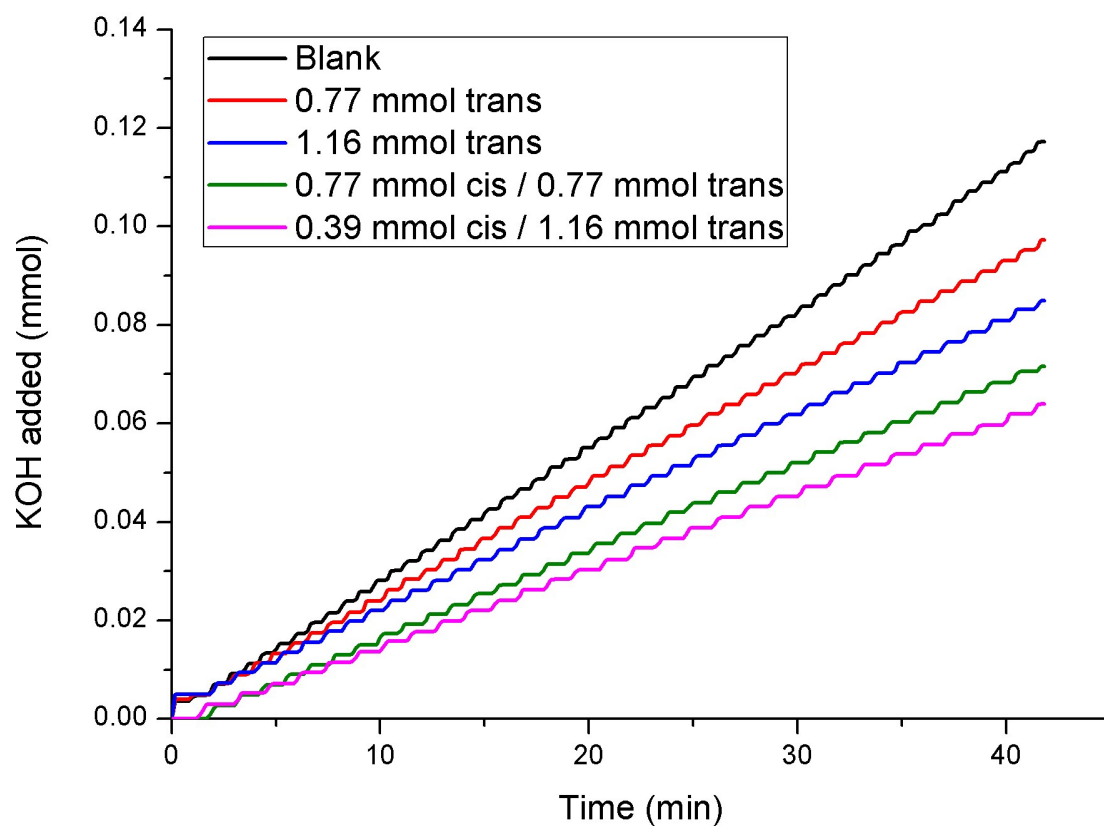

**Figure S8.** Raw data for the graph depicted in Figure 8 in the article.
